# Supplementary material for: Impacts of cloud water droplets on the OH production rate from peroxide photolysis
Source: Royal Society of Chemistry journal article supplement (doi:10.1039/c7cp06813a), 2017-01-01
Supplement: c7cp06813a1.pdf [file c7cp06813a1.pdf]

## Supplementary Material

### Impact of cloud water droplets on OH production rate from peroxide photolysis

Marilia T. C. Martins-Costa<sup>1</sup>, Josep M. Anglada<sup>2</sup>, Joseph S. Francisco<sup>3</sup>, Manuel F. Ruiz-López<sup>1</sup>

<sup>1</sup>SRSMC, University of Lorraine, CNRS, BP 70239, 54506 Vandoeuvre-lès-Nancy, France.

<sup>2</sup>Departament de Química Biològica i Modelització Molecular (IQAC – CSIC), c/ Jordi Girona 18, E-08034 Barcelona, Spain.

<sup>3</sup>College of Arts and Sciences, University of Nebraska-Lincoln, 1223 Oldfather Hall Lincoln, Lincoln, Nebraska 68588-0312, United States.

### SUMMARY

#### 1. Computational approach

*Molecular dynamics simulations using a hybrid QM/MM force-field*

*Free energy calculations*

*Calculation of the UV-Vis spectrum*

#### 2. Figures

#### 3. References

## 1. Computational approach

The calculations have been carried out using a combined molecular dynamics and quantum mechanics approach. This approach is similar to that described in our previous work devoted to ozone photolysis at the vapor-liquid water interface.<sup>1</sup>

### *Molecular dynamics simulations using a hybrid QM/MM force-field*

Simulations have been carried out using the hybrid QM/MM approach<sup>2,3</sup> developed in our group.<sup>4-7</sup> The solute is described quantum mechanically (QM), the solvent is described classically using molecular mechanics (MM), and we allow for QM/MM electrostatic embedding. The simulations are done in the NVT ensemble (T=298K, Nosé–Hoover thermostat<sup>8,9</sup>) using a box containing the solute and 499 water molecules. The box size is (in Å) 24.685 x 24.685 x 130. Periodic boundary conditions are used along the X and Y directions. The solute MHP is described at the B3LYP level<sup>10</sup> using the 6-311+G(d) basis set.<sup>11-13</sup> Water molecules are described using the TIP3P model.<sup>14</sup> We use the Gaussian 09 program<sup>15</sup> for the QM calculations, Tinker 4.2<sup>16</sup> for the MD simulations and the interface developed by the group of Nancy.<sup>17</sup> The time step is 0.25 fs. After equilibration, the simulation is carried out for about 5.5 ns using a horsetail parallel sampling method.<sup>18,19</sup>

### *Free energy calculations*

The free energy profile for the accommodation process in Figure 1S has been calculated using the umbrella sampling<sup>20</sup> and WHAM<sup>21,22</sup> methods. The reaction coordinate is the distance between the center of mass of the solute and the center of mass of the solvent. This distance is varied by steps of 0.25 Å. We assume a bias potential force constant  $k=10 \text{ kcal/mol/Å}^2$ . After thermalization (T=298K), we carry out a trajectory of 70 ps for each point along the reaction coordinate.

### *Calculation of the UV-Vis spectrum*

From a QM/MM trajectory (93 ps) of MHP at the air-water interface, 370 snapshots were saved at regular intervals for further analysis. For each snapshot, the UV-Vis spectrum was calculated for MHP interacting electrostatically with the TIP3P water molecules that fall within a cutoff radius of 12.342 Å; water molecules in the snapshots beyond this radius are disregarded. We use the multi-reference configuration interaction (MRCI) method and the aug-cc-pVTZ basis set. The cross-section for a specific electronic transition is obtained through a Gaussian convolution using the expression:

$$\sigma(\nu) = 0.811 \times 10^{-12} \frac{f}{\Delta\nu_{1/2}} e^{-2.772 \left( \frac{\nu - \nu_0}{\Delta\nu_{1/2}} \right)^2}$$

where  $f$  is the oscillator strength for the electronic excitation energy  $\nu_0$ . Units of  $\sigma$  are  $\text{cm}^2 \cdot \text{molecule}^{-1}$  if  $\Delta\nu_{1/2}$  is expressed in  $\text{cm}^{-1}$ . We use  $\Delta\nu_{1/2} = 4839 \text{ cm}^{-1}$ . The cross-sections for the first five excited states have been added up. The final spectrum is obtained by averaging over the 370 snapshots. A similar calculation has been done for the isolated MHP to estimate the gas phase spectrum but using in this case a shorter trajectory (10 ps).

To account for errors in the COOH torsional angle distribution due to limited accuracy of the quantum mechanical method in the QM/MM simulations (B3LYP/6-311+G(d) level), the spectrum of each snapshot is multiplied by a weight factor estimated by the expression:  $w = \exp(-\Delta E/RT)$ , where  $\Delta E = E(\text{QM}^2/\text{MM}) - E(\text{QM}^1/\text{MM})$ , with  $\text{QM}^2 = \text{CCSD(T)}/\text{aug-cc-pVQZ}$ ,  $\text{QM}^1 = \text{B3LYP}/6-311+\text{G(d)}$  and  $\text{MM}=\text{TIP3P}$ .

The MRCI calculations with single and double excitations have been carried out with the ORCA program package.<sup>23</sup> All valence electrons were correlated, whereas the electrons of the 1s atomic orbitals from the oxygen and carbon atoms were frozen. The most important configurations were selected with a  $10^{-6}$  hartree of cutoff threshold and the Davidson correction was applied to approximately account for higher excitations.

## 2. Figures

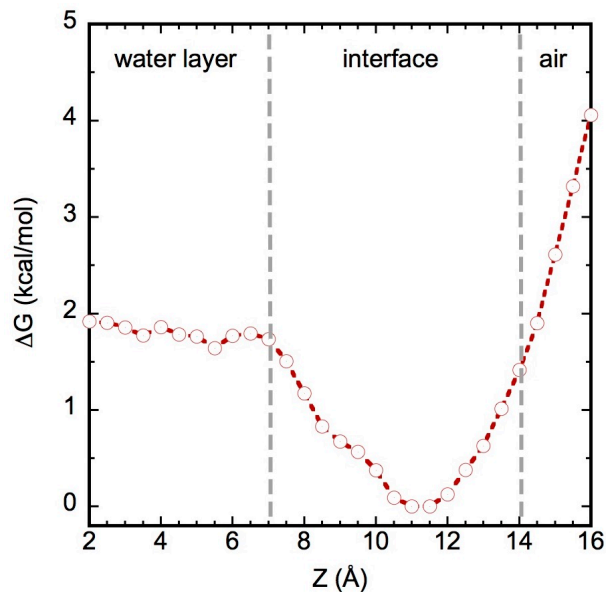

**Figure S1.** Free energy profile for MHP accommodation illustrating the high affinity of this peroxide for the air-water interface.  $Z$  is the distance between the MHP center of mass and the center of mass of the simulation box. The formal interface is at  $Z=12$  Å. The average bulk/interface free energy difference is estimated here to  $1.2 \text{ kcal}\cdot\text{mol}^{-1}$ . We assume an interface width of 7 Å (between  $7 \text{ Å} < Z < 14 \text{ Å}$ ) (see also Figure 1), which is close to the estimated width made in reference.<sup>24</sup> The calculations were carried out using QM/MM Molecular dynamics simulations at the B3LYP/6-311+G(d) level. The experimental free energy of solvation ( $1\text{M}\rightarrow 1\text{M}$ ) for MHP is  $-5.3 \text{ kcal}\cdot\text{mol}^{-1}$ .<sup>25</sup>

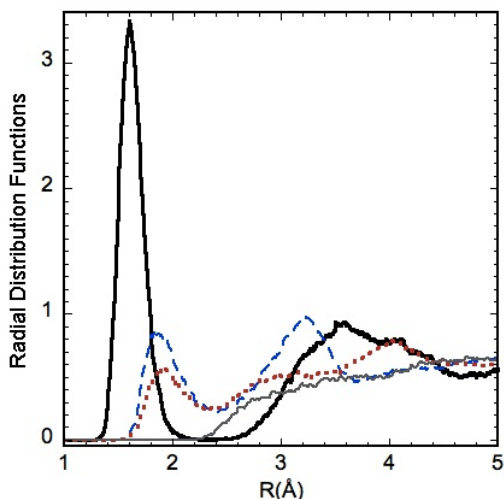

**Figure S2.** Solute-solvent radial distribution functions for MHP at the vapor-liquid water interface. They illustrate the formation of hydrogen-bonds between the  $O^aO^bH$  moiety of MHP and water molecules:  $H-O_{\text{water}}$  (black),  $O^b-H_{\text{water}}$  (blue),  $O^a-H_{\text{water}}$  (red).

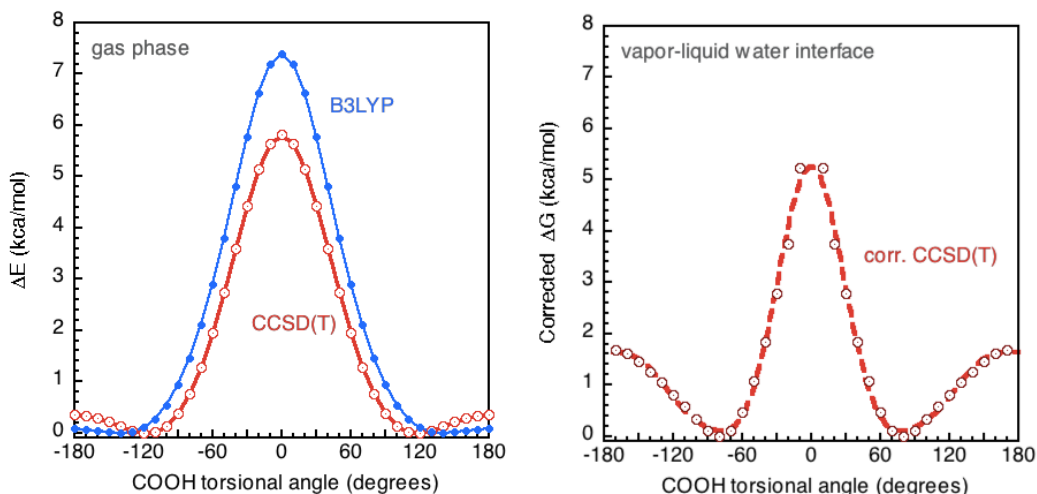

**Figure S3.** Calculated energy curves as a function of the COOH torsional angle in MHP. Left: potential energy in the gas phase. Right: corrected free energy at the vapor-liquid water interface. In the gas phase, the B3LYP curve (blue) corresponds to relaxed scan calculations at the B3LYP/6-311+G(d) level, while CCSD(T) (red) corresponds to single point CCSD(T)/aug-cc-pVQZ calculations on the preceding geometries. The free energy curve at the interface corresponds to an estimated CCSD(T)/aug-cc-pVQZ free energy profile; we use the approximation  $\Delta G_{\text{interface}}(\text{CCSD(T)}) \approx \Delta G_{\text{interface}}(\text{B3LYP}) + \Delta E_{\text{gas}}(\text{CCSD(T)}) - \Delta E_{\text{gas}}(\text{B3LYP})$ . The term  $\Delta G_{\text{interface}}(\text{B3LYP})$  is obtained from the 5.5 ns simulation using the horsetail sampling method.

### 3. References

- 1 Anglada, J. M., Martins-Costa, M., Ruiz-Lopez, M. F. & Francisco, J. S. Spectroscopic signatures of ozone at the air-water interface and photochemistry implications. *Proc. Natl. Acad. Sci. USA* **111**, 11618-11623 (2014).
- 2 Field, M. J., Bash, P. A. & Karplus, M. A combined quantum mechanical and molecular mechanical potential for molecular dynamics simulations. *J. Comput. Chem.* **11**, 700-733 (1990).
- 3 Warshel, A. & Levitt, M. Theoretical studies of enzymic reactions: dielectric, electrostatic and steric stabilization of the carbonium ion in the reaction of lysozyme. *J. Mol. Biol.* **103**, 227-249 (1976).
- 4 Tuñón, I., Martins-Costa, M. T. C., Millot, C. & Ruiz-Lopez, M. F. Coupled density functional/molecular mechanics Monte Carlo simulations of ions in water. The bromide ion. *Chem. Phys. Lett.* **241**, 450-456 (1995).
- 5 Tuñón, I., Martins-Costa, M. T. C., Millot, C. & Ruiz-Lopez, M. F. A hybrid density functional classical molecular dynamics simulation of a water molecule in liquid water. *J. Mol. Mod.* **1**, 196-201 (1995).
- 6 Tuñón, I., Martins-Costa, M. T. C., Millot, C. & Ruiz-Lopez, M. F. Molecular dynamics simulations of elementary chemical processes in liquid water using combined density functional and molecular mechanics potentials .1. Proton transfer in strongly H-bonded complexes. *J. Chem. Phys.* **106**, 3633-3642 (1997).
- 7 Tuñón, I., Ruiz-Lopez, M. F., Rinaldi, D. & Bertrán, J. Computation of hydration free energies using a parameterized continuum model: Study of equilibrium geometries and reactive processes in water solution. *J. Comput. Chem.* **17**, 148-155 (1996).
- 8 Hoover, W. G. Canonical dynamics: Equilibrium phase-space distributions. *Phys. Rev. A* **31**, 1695-1697 (1985).
- 9 Nosé, S. A unified formulation of the constant temperature molecular dynamics methods. *J. Chem. Phys.* **81**, 511-519 (1984).
- 10 Becke, A. D. Density-functional thermochemistry. III. The role of exact exchange. *J. Chem. Phys.* **98**, 5648-5652 (1993).
- 11 Hehre, W. J., Ditchfie.R & Pople, J. A. Self-Consistent Molecular Orbital Methods. XII. Further Extensions of Gaussian-Type Basis Sets for Use in Molecular Orbital Studies of Organic Molecules *J. Chem. Phys.* **56**, 2257-2261 (1972).
- 12 Hehre, W. J., Stewart, R. F. & Pople, J. A. Self-consistent molecular orbital methods. I Use of gaussian expansions of Slater-type atomic orbitals. *J. Chem. Phys.* **51**, 2657-2664 (1969).
- 13 Krishnan, R., Binkley, J. S., Seeger, R. & Pople, J. A. Self-consistent molecular orbital methods. XX. A basis set for correlated wave functions. *J. Chem. Phys.* **72**, 650-654 (1980).
- 14 Jorgensen, W. L., Chandrasekhar, J., Madura, J. D., Impey, R. W. & Klein, M. L. Comparison of simple potential functions for simulating liquid water *J. Chem. Phys.* **79**, 926-935 (1983).
- 15 Gaussian 09 (Gaussian, Inc., Wallingford, CT, USA, 2009).
- 16 TINKER: Software Tools for Molecular Design v. 4.2 (Washington University School of Medicine: Saint Louis, MO., 2004).

- 17 Martins-Costa, M. T. C. & Ruiz-López, M. F. Molecular dynamics of hydrogen peroxide in liquid water using a combined quantum/classical force field. *Chem. Phys.* **332**, 341 (2007).
- 18 Martins-Costa, M. T. & Ruiz-López, M. F. Reaching multi-nanosecond timescales in combined QM/MM molecular dynamics simulations through parallel horsetail sampling. *J. Comput. Chem.* **38**, 659-668 (2017).
- 19 Martins-Costa, M. T. & Ruiz-López, M. F. Highly accurate computation of free energies in complex systems through horsetail QM/MM molecular dynamics combined with free-energy perturbation theory. *Theoret. Chem. Acc.* **136**, 50 (2017).
- 20 Torrie, G. M. & J. P. Valleau. Nonphysical sampling distributions in Monte Carlo free-energy estimation: Umbrella sampling. *J. Comput. Phys.* **23**, 187-199 (1977).
- 21 Kumar, S., Rosenberg, J. M., Bouzida, D., Swendsen, R. H. & Kollman, P. A. The weighted histogram analysis method for free-energy calculations on biomolecules. I. The method. *J. Comput. Chem.* **13**, 1011-1021 (1992).
- 22 Roux, B. The calculation of the potential of mean force using computer simulations. *Comput. Phys. Commun.* **91**, 275-282 (1995).
- 23 Neese, F. The ORCA program system. *Wiley Interdiscip. Rev. Comput. Mol. Sci.* **2**, 73-78 (2012).
- 24 Vácha, R., Slaviček, P., Mucha, M., Finlayson-Pitts, B. J. & Jungwirth, P. Adsorption of atmospherically relevant gases at the air/water interface: Free energy profiles of aqueous solvation of N<sub>2</sub>, O<sub>2</sub>, O<sub>3</sub>, OH, H<sub>2</sub>O, HO<sub>2</sub>, and H<sub>2</sub>O<sub>2</sub>. *J. Phys. Chem. A* **108**, 11573-11579 (2004).
- 25 O'Sullivan, D. W., Lee, M., Noone, B. C. & Heikes, B. G. Henry's Law Constant Determinations for Hydrogen Peroxide, Methyl Hydroperoxide, Hydroxymethyl Hydroperoxide, Ethyl Hydroperoxide, and Peroxyacetic Acid. *J. Phys. Chem.* **100**, 3241-3247 (1996).
